# Supplementary material for: Safety and tumour-specific immunological responses of combined dendritic cell vaccination and anti-CD40 agonistic antibody treatment for patients with metastatic pancreatic cancer: protocol for a phase I, open-label, single-arm, dose-escalation study (REACtiVe-2 trial)
Source: HighWire-hosted journal article supplement (doi:10.1136/bmjopen-2021-060431), 2022-06-01
Supplement: bmjopen-2021-060431supp002_data_supplement.pdf [file bmjopen-2021-060431supp002_data_supplement.pdf]

Supplementary table 1: WHO trial registration data set.

| <b>WHO Trial Registration Data Set</b>                |                                                                                                                                                                                                                                                                 |
|-------------------------------------------------------|-----------------------------------------------------------------------------------------------------------------------------------------------------------------------------------------------------------------------------------------------------------------|
| <b>Primary registry and trial identifying number</b>  | <b>EudraCT number:</b> 2021-000289-13<br><b>Netherlands trial register:</b> NL9723                                                                                                                                                                              |
| <b>Date of registration in primary register</b>       | 20 <sup>th</sup> July 2021                                                                                                                                                                                                                                      |
| <b>Protocol version</b>                               | Version 3, date 27-05-2021                                                                                                                                                                                                                                      |
| <b>SPIRIT guidelines data set for clinical trials</b> | Attached as a supplementary file                                                                                                                                                                                                                                |
| <b>Source of monetary or material support</b>         | F.R. van 't Land, Study Coordinator<br>Department of Surgery<br>Erasmus MC University Medical Center,<br>Rotterdam, The Netherlands<br><a href="mailto:f.vantland@erasmusmc.nl">f.vantland@erasmusmc.nl</a>                                                     |
| <b>Primary Sponsor</b>                                | Erasmus MC University Medical Center,<br>Department of Pulmonary Medicine,<br>Represented by Prof. Dr. J.G.J.V. Aerts,<br>Rotterdam, The Netherlands                                                                                                            |
| <b>Contact for Public Queries</b>                     | F.R. van 't Land, Study Coordinator<br>Department of Surgery<br>Erasmus MC University Medical Center,<br>Rotterdam, The Netherlands<br><a href="mailto:f.vantland@erasmusmc.nl">f.vantland@erasmusmc.nl</a>                                                     |
| <b>Contact for Scientific Queries</b>                 | C. H. J. van Eijck, Coordinating investigator<br>Department of Surgery<br>Erasmus MC University Medical Center,<br>Rotterdam, The Netherlands.<br><a href="mailto:c.vaneijck@erasmusmc.nl">c.vaneijck@erasmusmc.nl</a>                                          |
| <b>Public Title</b>                                   | Combining dendritic cell vaccination and anti-CD40 agonist for metastatic pancreatic cancer patients                                                                                                                                                            |
| <b>Scientific Title</b>                               | Safety and tumor-specific immunological responses of combined dendritic cell vaccination and anti-CD40 agonistic antibody treatment for patients with metastatic pancreatic cancer: a phase I, open-label, single-arm, dose-escalation study (REACTiVe-2 Trial) |
| <b>Countries of Recruitment</b>                       | The Netherlands                                                                                                                                                                                                                                                 |
| <b>Health Condition(s) or Problem(s) Studied</b>      | Metastatic pancreatic cancer                                                                                                                                                                                                                                    |
| <b>Intervention(s)</b>                                | Vaccinations with autologous dendritic cells pulsed with an allogeneic mesothelioma tumor cell lysate (MesoPher)<br>Anti-CD40 agonist (mitazalimab)                                                                                                             |
| <b>Key Inclusion and Exclusion Criteria</b>           | See supplementary table 2                                                                                                                                                                                                                                       |
| <b>Study Type</b>                                     | Open-label, single-center, phase I dose finding study                                                                                                                                                                                                           |

|                                 |                                                                                                                                                                                                 |
|---------------------------------|-------------------------------------------------------------------------------------------------------------------------------------------------------------------------------------------------|
| <b>Date of First Enrollment</b> | 30 <sup>th</sup> August 2021                                                                                                                                                                    |
| <b>Sample Size</b>              | Minimum of 12, maximum of 18 patients                                                                                                                                                           |
| <b>Recruitment Status</b>       | Recruiting                                                                                                                                                                                      |
| <b>Primary Outcome(s)</b>       | Safety and tolerability of MesoPher/mitazalimab combination therapy                                                                                                                             |
| <b>Key Secondary Outcomes</b>   | Assessment of immune-responses upon therapy<br>Radiographical response rate as defined by RECIST version 1.1 and iRECIST                                                                        |
| <b>Ethics Review</b>            | Permission for the trial conduct was given by the Central Committee on Research Involving Human Subjects and the Medical Ethics Committee of the Erasmus MC University Medical Center Rotterdam |
